# Supplementary material for: Disparities in Sexual and Reproductive Health Service Utilization and Associated Factors among Adolescents with and without Disability in Southern Ethiopia
Source: Hindawi journal article supplement (doi:10.1155/2021/5573687), 2021-04-25
Supplement: f1 [file 5573687.f1.docx]

**PART ONE: SOCIO-DEMOGRAPHIC CHARACTERISTICS**

| No | Question | Answer | Skip |
| --- | --- | --- | --- |
| 101 | Age of the respondant | ……………… |  |
| 102 | Sex of the respondent? | Male ………1  Female. ………..2 |  |
| 103 | What is the highest grade/number of years you Completed? | …………………. |  |
| 104 | What is your religion? | 1. Orthodox 2. Protestant 3. Muslim 4. Other   Specify………….. |  |
| 105 | Occupation of the father | 1. No occupation 2. Government employee 3. Private employee 4. Merchant 5. Student 6. Daily laborer 7. Handicraft 8. Other   Specify……………….. |  |
|  | Occupation of the mother | 1. No occupation 2. Government employee 3. Private employee 4. Merchant 5. Student 6. Daily laborer 7. Handicraft 8. Other   Specify……………….. |  |
| 106 | Ethnicity | 1. Gamo 2. Gofa 3. Amhara 4. Oromo 5. Others …………… |  |
| 107 | Have you ever listen, watch and read any radio, television and magazine/newspaper about SRH | 1. Yes 2. No |
| 108 | How much is your house hold’s monthly income | …………………… |  |
| 109 | Marital status | 1. Currently married 2. Living with one partner 3. Previously living with partner now not 4. Never married |  |
| 110 | What is the highest grade/number of years that your father completed? | ………………………….. |  |
| 111 | What is the highest grade/number of years that your mother completed? | -------------------------------------------- |  |
| 112 | Do you have any form of disabilities | 1. Yes 2. No |  |
| 113 | If Q112 yes specify your form of disabilities | -------------------------------------- |  |

**PART TWO: INDIVIDUAL LEVEL CHARACTERISTICS**

| 201 | Ever had sexual intercourse | 1. Yes 2. No |  |
| --- | --- | --- | --- |
| 202 | Are currently sexually active | 1. Yes 2. No |  |
| 203 | Do you perceive at risk for HIV/AIDS? | 1.yes  2. No |  |
| 204 | Have you discussed sexual and reproductive health issues with your  Parents for the last 12 month? | 1.yes  2. No |  |
| 205 | Have you discussed SRH issues with your peers for the last 12 month?  . | 1.Yes  2. No |  |
| 206 | Have you participated in school club of SRH | 1.Yes  2. No |  |
| 207 | Have you discussed SRH issues with health worker for the last 12 month | 1.Yes  2. No |  |

**3.1. KNOWLEDGE OF RESPONDENTS ABOUT SEXUAL AND REPRODUCTIVE HEALTH**

| No | Question (**did you know**?) | Yes | No | |
| --- | --- | --- | --- | --- |
| 301 | Did you know sexual and reproductive health services? |  |  | |
| 302 | If yes to Q302, Which one? |
| 303 | Information in SRH issues |  |  |
| 304 | FP service |  |  |
| 305 | Pregnancy testing and care |  |  |
| 306 | STI treatment |  |  |
| 307 | VCT for HIV |  |  |
| 308 | Condom provision service |  |  |
| 309 | Cervical cancer screening |  |  |
| 310 | Teen age pregnancy can lead to maternal and infant death? |  |  |
| 311 | Unwanted pregnancy can be prevented by using condom |  |  |
| 312 | Reproductive tract infection can be caused by unprotected sex? |  |  |

**3.2. ATTITUDE ABOUT SRH SERVICE**

| No | Question /Items | Response | | |
| --- | --- | --- | --- | --- |
| Agree | Not agree | Not sure |
| 313 | Using condom is a sign of not trusting your partner. |  |  |  |
| 314 | A boy/girl should have sex before he/she gets married |  |  |  |
| 315 | Discussing condom or other contraceptive methods with young people promotes  Promiscuity |  |  |  |
| 316 | Believe that risk of AIDS can be reduced by VCT services |  |  |  |
| 317 | I prefer to visit health facilities to get sexual and reproductive health services |  |  |  |
| 318 | There is no problem if service provider of sexual and reproductive services is either young or adult. |  |  |  |
| 319 | There is no problem if service provider of sexual and reproductive services can be male or female. |  |  |  |

**PART FOUR: QUESTIONS RELATED TO UTILIZATION OF SEXUAL &
REPRODUCTIVE HEALTH SERVICES**

| 401 | Have you utilized one of sexual and reproductive health services in the last 12 months? | 1. Yes 2. No |  |
| --- | --- | --- | --- |
| 402 | If yes circle which SRH services did you utilize (more than one answer is possible)?   1. FP service 2. Pregnancy testing and care 3. STI treatment 4. VCT for HIV 5. Condom provision service 6. SRH counseling 7. Abortion care |
| 403 | Reason not to utilize sexual  and reproductive health  services   1. Negative attitude of health professionals 2. Inconvenience opening hour 3. Inadequate medical equipment 4. Poor quality of the services 5. Locations of the facility 6. Lack privacy in the health care facilities 7. Embarrassment associated with SRH service use 8. Other, specify--------------------------------- |
